# Supplementary material for: Detection of De Novo Dividing Stem Cells In Situ through Double Nucleotide Analogue Labeling
Source: MDPI journal article supplement (doi:10.3390/cells11244001), 2022-12-10
Supplement: s1 [file s1]

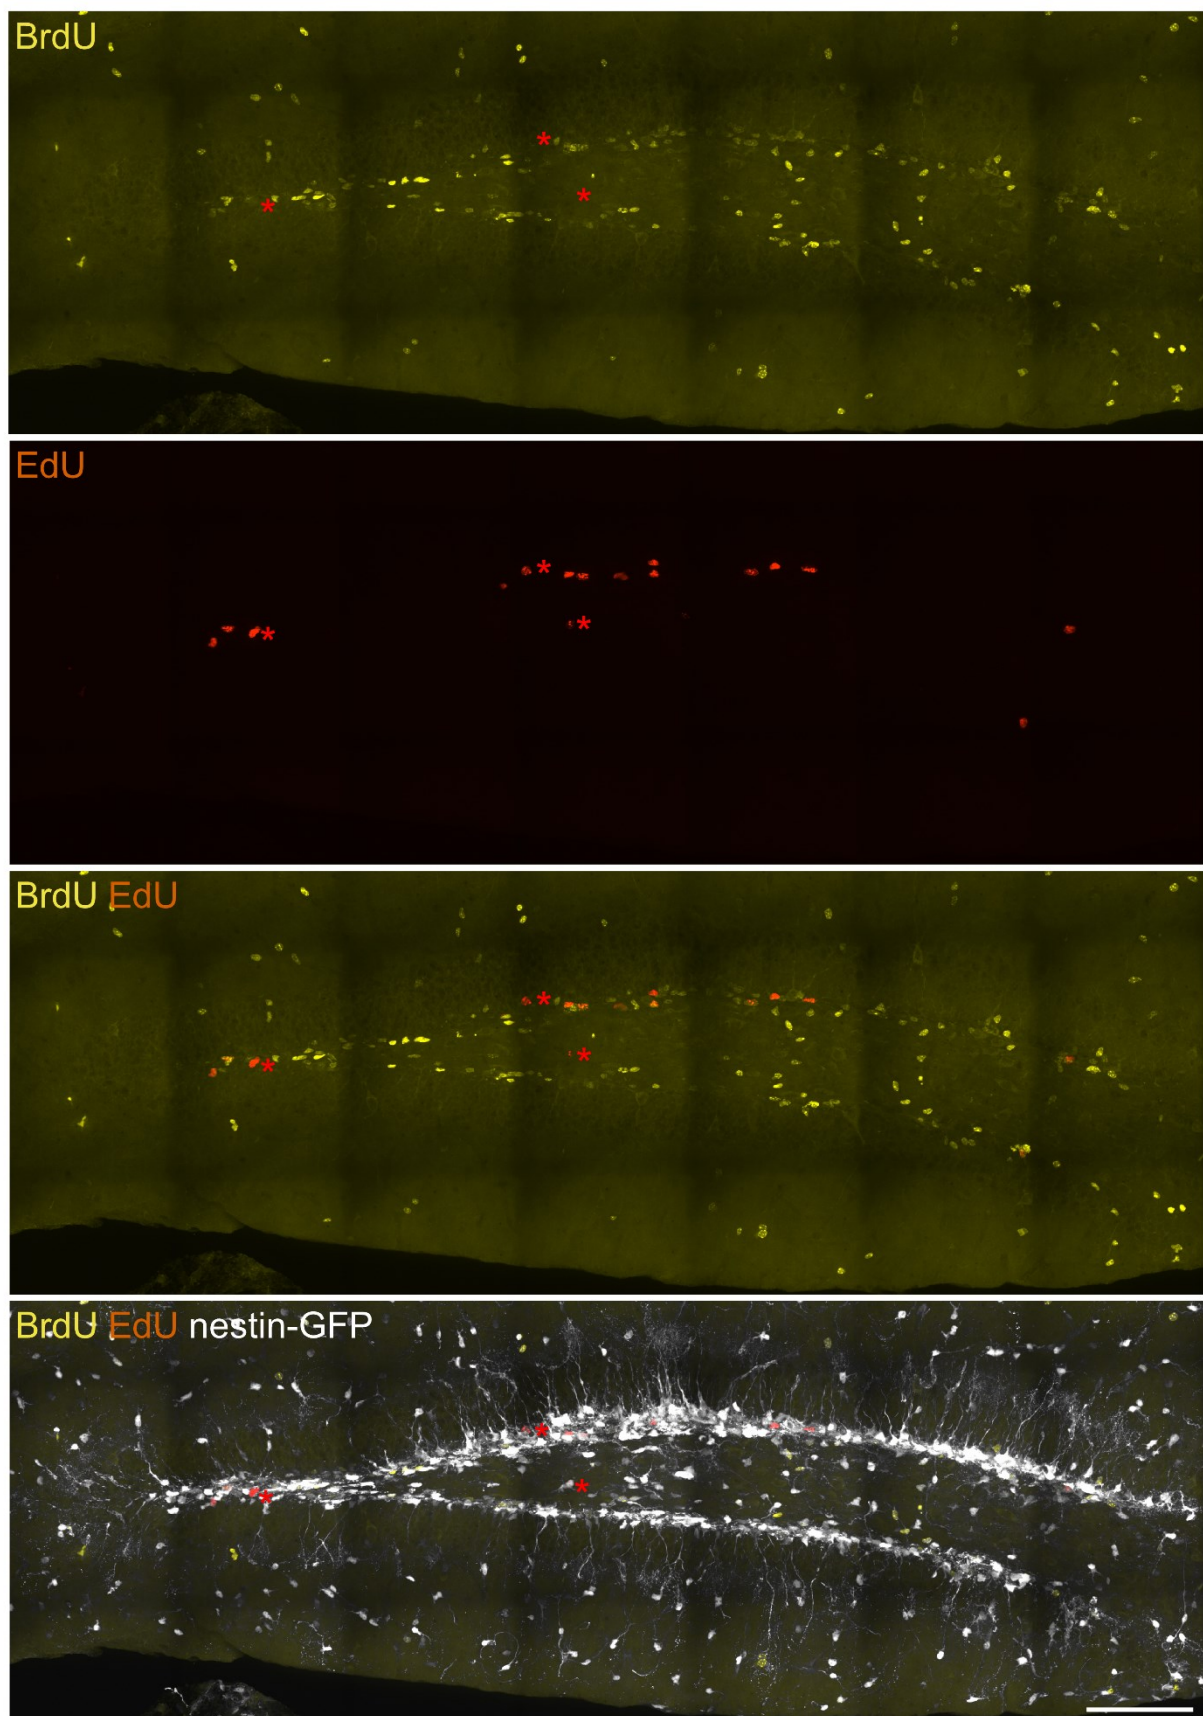

**Supplementary Figure S1 (related to Figure 2B).** Detection of *de novo* dividing in the hippocampal dentate gyrus through double nucleotide analogue labeling. The image is a maximal projection of a Z-stack captured with a confocal microscope. Red asterisks indicate  $\text{EdU}^+\text{BrdU}^-$  nuclei. Scale bar: 100  $\mu\text{m}$ .

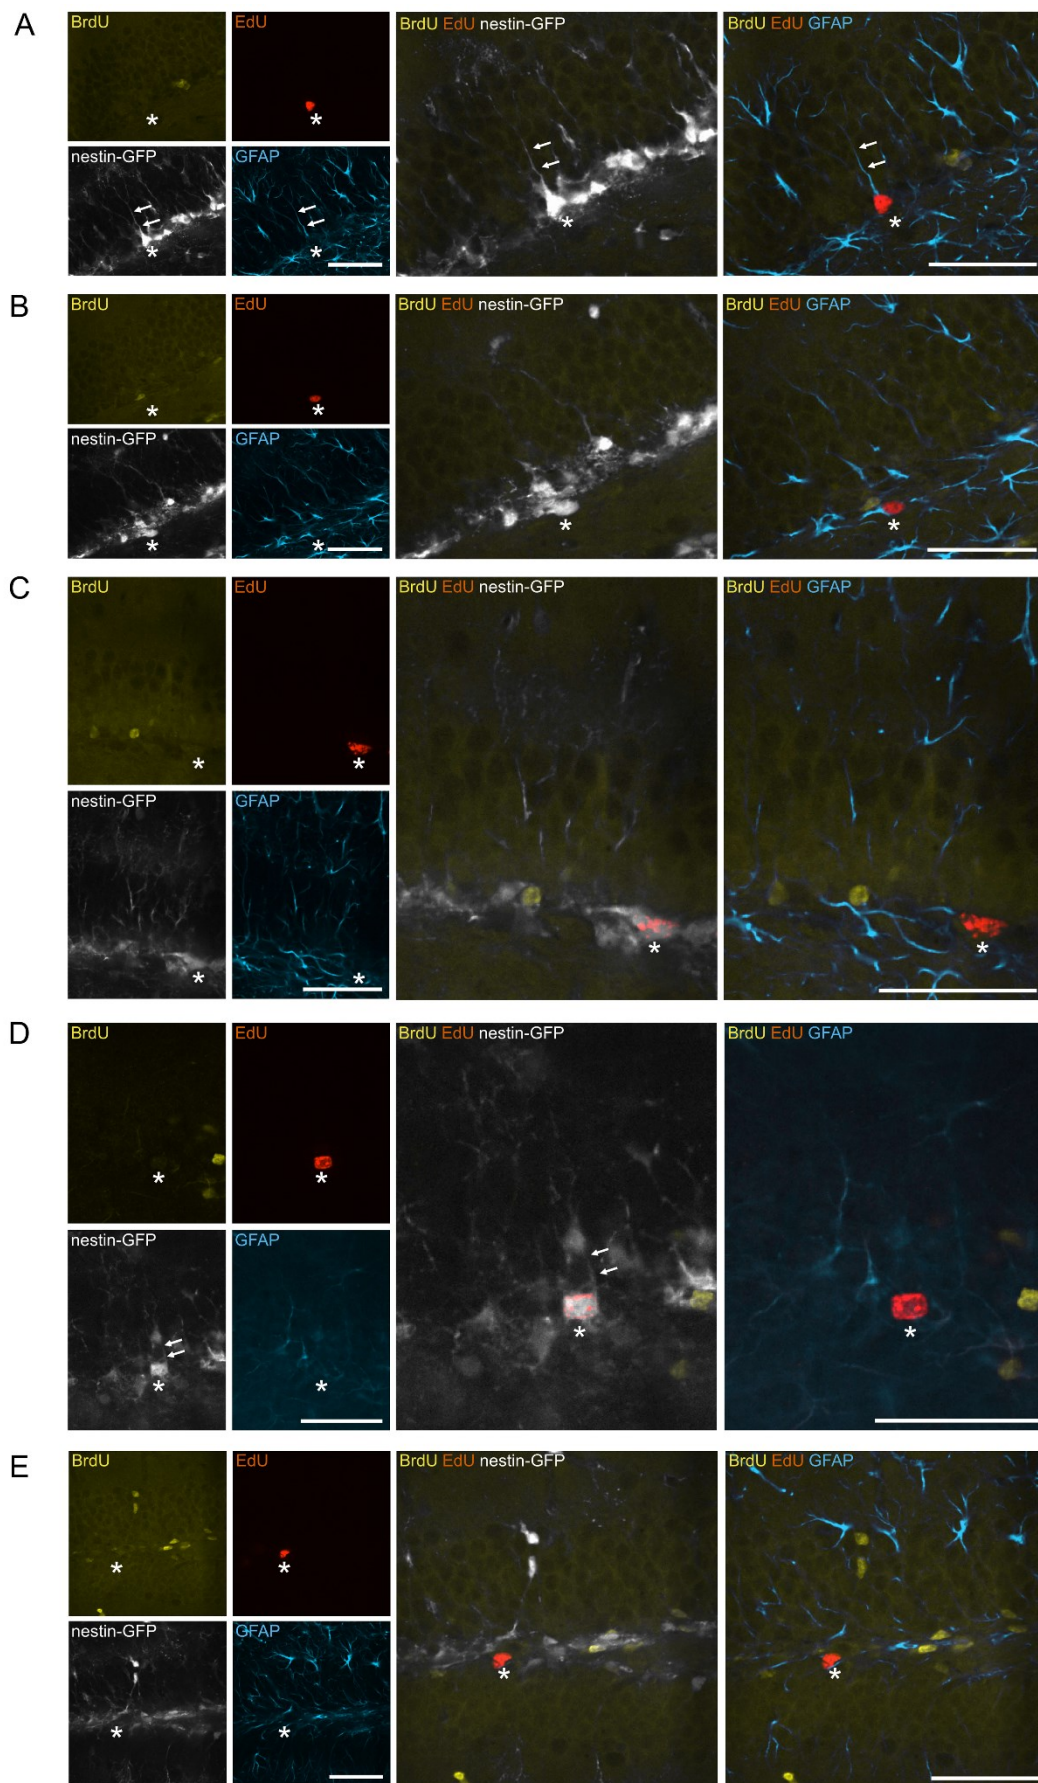

**Supplementary Figure S2 (related to Figure 2D).** Representative images of the identified phenotypes of  $\text{EdU}^+\text{BrdU}^-$  cells. **A**  $\text{GFP}^+\text{GFAP}^+\text{process}^+$  RGLs, **B**  $\text{GFP}^+\text{GFAP}^+\text{process}^-$  presumptive RGLs, **C**  $\text{GFP}^+\text{GFAP}^-\text{process}^-$ , **D**  $\text{GFP}^+\text{GFAP}^-\text{process}^+$ , and **E**  $\text{GFP}^+\text{GFAP}^-\text{process}^-$ . Here, images are single optical section captured with a

confocal microscope. Asterisks indicate bodies of  $\text{EdU}^+\text{BrdU}^-$  cells. Arrows indicate an apical process. Scale bars: 50  $\mu\text{m}$ .

**Supplementary Table S1 (related to Figure 2D).** Percentages of specific cell phenotypes within the EdU<sup>+</sup>BrdU<sup>-</sup> population.

| Phenotype                                                                                                     | Percentages for individual mice (%) |      |    |      |      |      | mean (%) | SEM (%) |
|---------------------------------------------------------------------------------------------------------------|-------------------------------------|------|----|------|------|------|----------|---------|
|                                                                                                               | 1                                   | 2    | 3  | 4    | 5    | 6    |          |         |
| EdU <sup>+</sup> BrdU <sup>-</sup> GFP <sup>+</sup> GFAP <sup>+</sup> process <sup>+</sup> (RGLs)             | 57.2                                | 41.7 | 50 | 72.6 | 25   | 70.5 | 52.8     | 7.3     |
| EdU <sup>+</sup> BrdU <sup>-</sup> GFP <sup>+</sup> GFAP <sup>+</sup> process <sup>-</sup> (presumptive RGLs) | 14.5                                | 16.6 | 50 | 4.6  | 33.1 | 17.5 | 22.7     | 6.6     |
| EdU <sup>+</sup> BrdU <sup>-</sup> GFP <sup>+</sup> GFAP <sup>-</sup> process <sup>-</sup>                    | 21.4                                | 33.1 | 0  | 9.3  | 16.9 | 6    | 14.5     | 4.9     |
| EdU <sup>+</sup> BrdU <sup>-</sup> GFP <sup>-</sup> GFAP <sup>-</sup> process <sup>-</sup>                    | 6.9                                 | 0    | 0  | 0    | 25   | 0    | 5.3      | 4.1     |
| EdU <sup>+</sup> BrdU <sup>-</sup> GFP <sup>+</sup> GFAP <sup>-</sup> process <sup>+</sup>                    | 0                                   | 8.6  | 0  | 13.5 | 0    | 6    | 4.7      | 2.3     |
